# Supplementary material for: Effect of hydrophobized PET TeMs membrane pore-size on saline water treatment by direct contact membrane distillation
Source: Royal Society of Chemistry journal article supplement (doi:10.1039/d3ra07475g), 2024-01-01
Supplement: d3ra07475g1.pdf [file d3ra07475g1.pdf]

List of supplementary materials

**Effect of hydrophobized PET TeMs membrane pore-size on the water treatment from salt by direct contact membrane distillation**

Arman B. Yeszhanov <sup>a,b\*</sup>, Ilya V. Korolkov <sup>a,b</sup>, Olgun Güven <sup>c</sup>, Galina B. Melnikova <sup>d</sup>, Saule S. Dosmagambetova <sup>b</sup>, Alexander N. Borissenko <sup>e</sup>, A.K. Nurkassimov <sup>e</sup>, Murat T. Kassymzhanov <sup>e</sup>, Maxim V. Zdorovets <sup>a,b</sup>

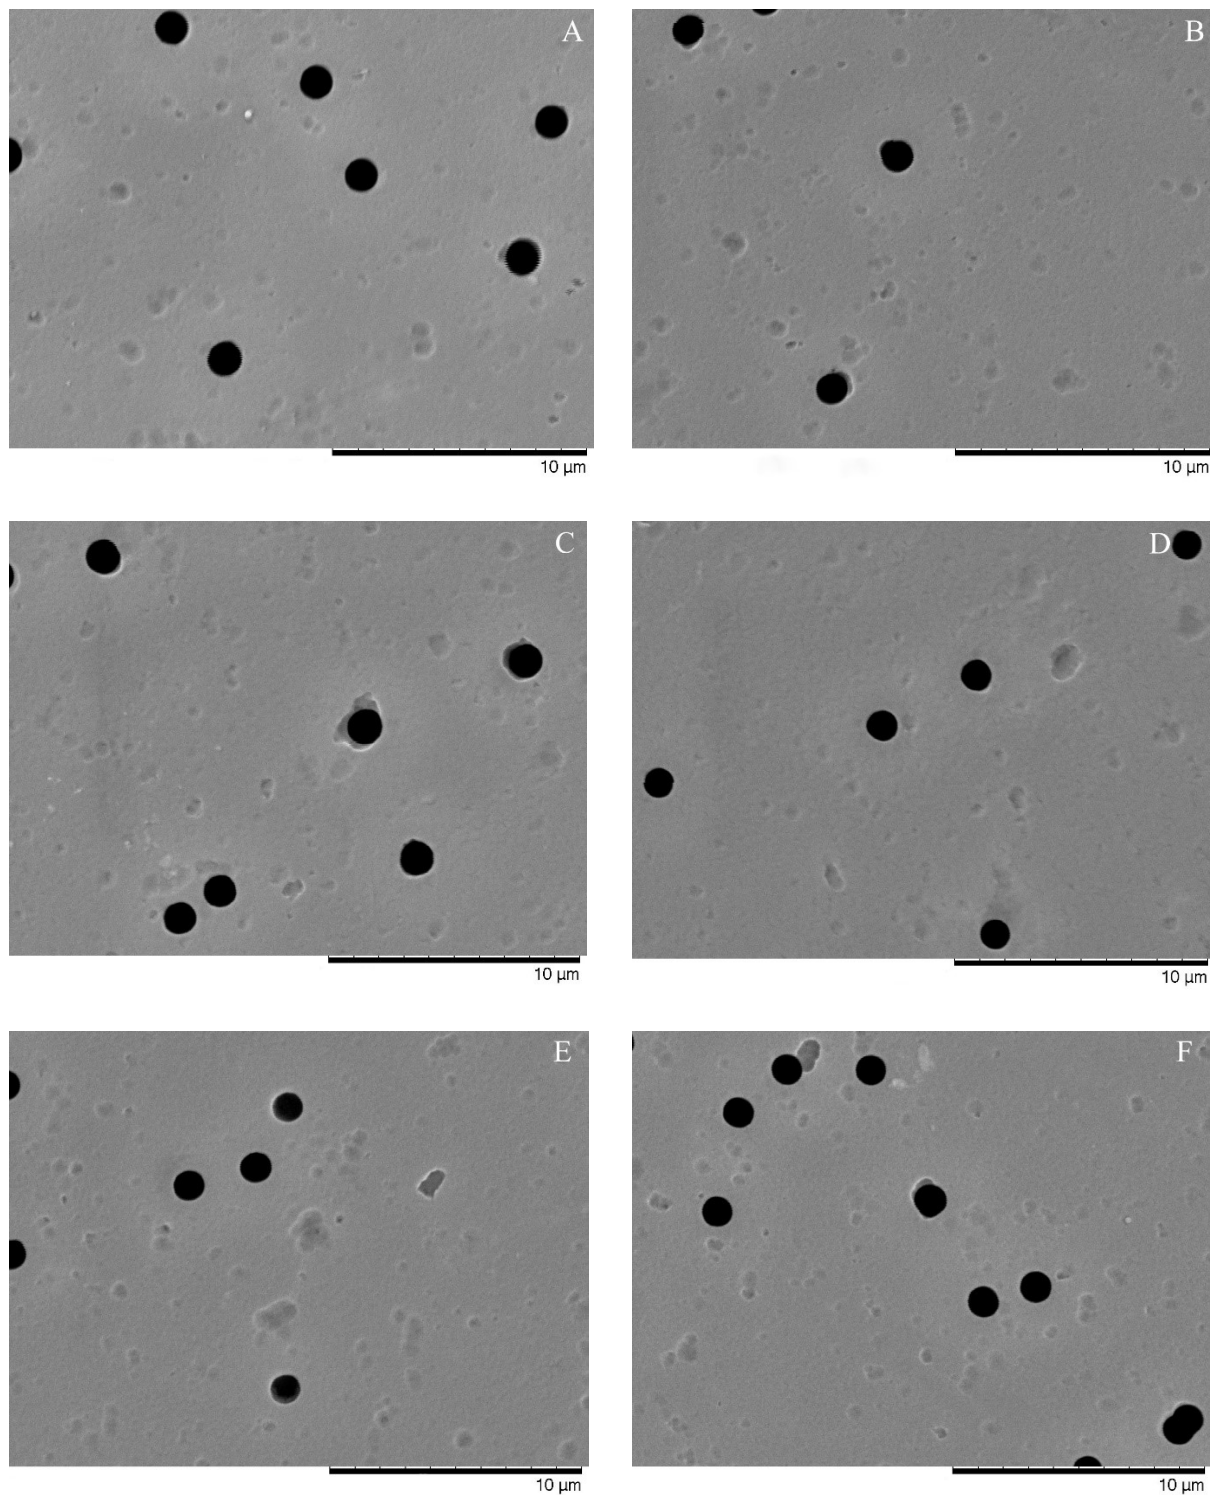

**Figure S1** – SEM images of pristine (a,b) PET TeMs and modified PET TeMs-g-PLMA with concentrations 10% (c,d), 20% (e,f) from both sides of membranes

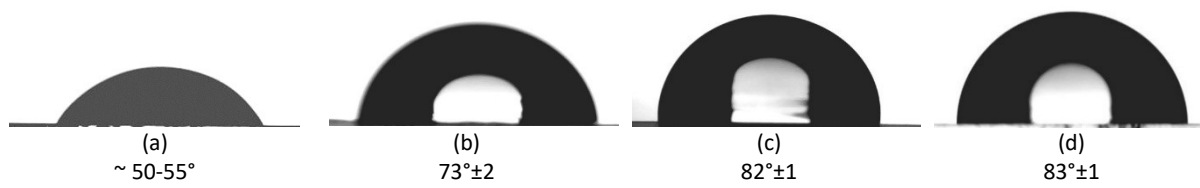

**Figure S2** – CA of pristine PET TeM (a) and PET TeMs-g-PLMA with a grafting degree – 0.62% (b), 1.74% (c), 3.2% (d)
